# Supplementary material
Source: MDPI journal article supplement (https://www.mdpi.com/2227-7102/12/8/518)
Supplement: s1 [file s1]

Archive with 2 entries (2 files):
- Supplement 1 Curriculum content checklist NCP.pdf
- Supplement 2 Analysing expected learning outcomes and curriculum for Infant and Young Child Feeding Becker PNG.pdf
