# Supplementary material
Source: MDPI journal article supplement (https://www.mdpi.com/2227-7102/12/8/518)
Supplement: s1 [file s1 › Supplement 1 Curriculum content checklist NCP.pdf]

## Curriculum content checklist

Curriculum Mapping Pre-service Education on Essential Nutrition Actions for Maternal, Infant, and Young Child Nutrition (MIYCN) for Health Professionals undertaken in four countries of South-East Asia (Indonesia, Lao PDR, Myanmar, and Philippines) led by the Nutrition Center of the Philippines (NCP) from August to November 2018, supported by Alive & Thrive.

\* Status

|                                                                                                                                                                                       |                                                              |                                                                             |                         |         |
|---------------------------------------------------------------------------------------------------------------------------------------------------------------------------------------|--------------------------------------------------------------|-----------------------------------------------------------------------------|-------------------------|---------|
| For knowledge / theoretical concepts                                                                                                                                                  | 0 - not included                                             | 1 - included                                                                |                         |         |
| For skills:                                                                                                                                                                           | 0 - curriculum does not include this skill                   | 1 - curriculum provides demonstration of this skill                         |                         |         |
|                                                                                                                                                                                       | 2 - curriculum requires students to role play or return demo | 3 - curriculum requires students to provide this service to actual patients |                         |         |
| Name of Institution:                                                                                                                                                                  |                                                              |                                                                             |                         |         |
| Course:                                                                                                                                                                               |                                                              |                                                                             |                         |         |
| Degree                                                                                                                                                                                |                                                              |                                                                             |                         |         |
| Topics                                                                                                                                                                                |                                                              | Year level topic was introduced                                             | Course / Subjects title | Status* |
| Knowledge of Nutrition-Specific Interventions                                                                                                                                         |                                                              |                                                                             |                         |         |
| Maternal Health and Nutrition                                                                                                                                                         |                                                              |                                                                             |                         |         |
| Nutritional assessment of pregnant and lactating women (dietary assessment, mid-upper arm circumference, gestational weight gain, clinical assessment for micronutrient deficiencies) |                                                              |                                                                             |                         |         |
| Iron and folic acid supplementation for pregnant and lactating women                                                                                                                  |                                                              |                                                                             |                         |         |
| Vitamin A supplementation for lactating women                                                                                                                                         |                                                              |                                                                             |                         |         |
| Calcium supplementation for pregnant women                                                                                                                                            |                                                              |                                                                             |                         |         |
| Iodine supplementation for pregnant and lactating women                                                                                                                               |                                                              |                                                                             |                         |         |
| Birth spacing and the lactation amenorrhea method                                                                                                                                     |                                                              |                                                                             |                         |         |
| Key messages in nutrition counseling for pregnant women                                                                                                                               |                                                              |                                                                             |                         |         |
| - - One extra meal per day                                                                                                                                                            |                                                              |                                                                             |                         |         |
| - - Micronutrient supplements/treatment (or protein-energy supplements for undernourished mothers)                                                                                    |                                                              |                                                                             |                         |         |
| - - Water, sanitation, and hygiene                                                                                                                                                    |                                                              |                                                                             |                         |         |
| Key messages in nutrition counseling for lactating women                                                                                                                              |                                                              |                                                                             |                         |         |
| - - Two extra meals per day                                                                                                                                                           |                                                              |                                                                             |                         |         |
| - - Micronutrient supplements/treatment (or protein-energy supplements for undernourished mothers)                                                                                    |                                                              |                                                                             |                         |         |
| - - Vitamin A supplementation (from birth to 6 weeks post-delivery according to national protocol)                                                                                    |                                                              |                                                                             |                         |         |
| - - Water, sanitation, and hygiene                                                                                                                                                    |                                                              |                                                                             |                         |         |
| Infant and Young Child Feeding (IYCF)                                                                                                                                                 |                                                              |                                                                             |                         |         |
| Importance of IYCF and recommended practices                                                                                                                                          |                                                              |                                                                             |                         |         |
| - - Importance of skin-to-skin with newborn                                                                                                                                           |                                                              |                                                                             |                         |         |
| - - Good positioning and attachment                                                                                                                                                   |                                                              |                                                                             |                         |         |
| - - Early initiation of breastfeeding (give colostrum)                                                                                                                                |                                                              |                                                                             |                         |         |
| - - Exclusive breastfeeding from birth up to 6 months (avoid other liquids and food, even water)                                                                                      |                                                              |                                                                             |                         |         |
| - - Breastfeeding on demand – up to 12 times day and night                                                                                                                            |                                                              |                                                                             |                         |         |
| - - Water, sanitation, and hygiene                                                                                                                                                    |                                                              |                                                                             |                         |         |
| Physiological basis of breastfeeding                                                                                                                                                  |                                                              |                                                                             |                         |         |
| Advantages of breastfeeding                                                                                                                                                           |                                                              |                                                                             |                         |         |
| Disadvantages of formula/ replacement feeding                                                                                                                                         |                                                              |                                                                             |                         |         |

This checklist is reproduced here with permission of Alive & Thrive and the Nutrition Center of the Philippines. It may be used for non-commercial purposes. It may be used for non-commercial purposes including citation of original source. Checklist prepared 2018.

|                                                                                                                                                                                      |  |  |  |
|--------------------------------------------------------------------------------------------------------------------------------------------------------------------------------------|--|--|--|
| <i>Common breast conditions</i>                                                                                                                                                      |  |  |  |
| -- inverted nipple                                                                                                                                                                   |  |  |  |
| -- breast engorgement                                                                                                                                                                |  |  |  |
| -- mastitis and breast abscess                                                                                                                                                       |  |  |  |
| <i>Complementary feeding</i>                                                                                                                                                         |  |  |  |
| - - timing, amount, frequency, consistency                                                                                                                                           |  |  |  |
| - - risks of starting complementary feeding too early                                                                                                                                |  |  |  |
| - - risks of starting complementary feeding too late                                                                                                                                 |  |  |  |
| - - nutritional care of infants and children with diarrhea                                                                                                                           |  |  |  |
| Continuing support for IYCF                                                                                                                                                          |  |  |  |
| <i>Appropriate feeding in exceptionally difficult circumstances</i>                                                                                                                  |  |  |  |
| - - Low birth weight                                                                                                                                                                 |  |  |  |
| - - Severe acute malnutrition                                                                                                                                                        |  |  |  |
| - - Infants of HIV-positive mothers                                                                                                                                                  |  |  |  |
| - - Sick child <6 months of age                                                                                                                                                      |  |  |  |
| - - Relactation                                                                                                                                                                      |  |  |  |
| <i>Nutritional care and support during emergencies</i>                                                                                                                               |  |  |  |
| - - Establishing safe 'corners' for mothers and infants                                                                                                                              |  |  |  |
| - - One-to-one counseling                                                                                                                                                            |  |  |  |
| - - Mother-to-mother support                                                                                                                                                         |  |  |  |
| - - Mental and emotional support for traumatized women having difficulty responding to their infants                                                                                 |  |  |  |
| - - Ways to breastfeed infants and young children who are separated from their mothers                                                                                               |  |  |  |
| - - Timely registration of newborns to support early initiation and exclusive breastfeeding                                                                                          |  |  |  |
| - - Early identification and management of infants and children with acute malnutrition to prevent serious illness and death                                                         |  |  |  |
| - - Nutritional adequacy and suitability of the general food ration for older infants and young children                                                                             |  |  |  |
| - - Ensuring and easing access to basic water and sanitation facilities, cooking, food and non-food items                                                                            |  |  |  |
| Policies and laws relevant to the protection, promotion and support of breastfeeding (i.e. EO 51, WHO International Code of Marketing BMS, 10 Steps to Successful Breastfeeding etc) |  |  |  |
| <b><i>Essential Nutrition Actions</i></b>                                                                                                                                            |  |  |  |
| Prevention of vitamin A deficiency                                                                                                                                                   |  |  |  |
| Prevention of iron-deficiency anemia                                                                                                                                                 |  |  |  |
| Prevention of iodine deficiency                                                                                                                                                      |  |  |  |
| Use of Micronutrient Powder by children 6 - 23 mo old                                                                                                                                |  |  |  |
| VA supplementation in children <5 years                                                                                                                                              |  |  |  |
| VA supplementation in children with measles                                                                                                                                          |  |  |  |
| Daily iron supplementation in 6-23 mo old children                                                                                                                                   |  |  |  |
| Zinc supplementation for diarrhea management                                                                                                                                         |  |  |  |
| Optimal iodine nutrition in young children                                                                                                                                           |  |  |  |
| Nutritional care and support of HIV-infected 6 mo - 14 yr old children                                                                                                               |  |  |  |
| <b><i>Diagnosis and Management of Severe Acute Malnutrition</i></b>                                                                                                                  |  |  |  |
| - - Use of Mid-upper arm circumference and/or Weight-for-Height as per WHO child growth standards                                                                                    |  |  |  |
| - - Clinical nutrition assessment                                                                                                                                                    |  |  |  |
| - - Outpatient management of Severe Acute Malnutrition without complications (2013 Guidelines)                                                                                       |  |  |  |
| - - Inpatient care of Severe Acute Malnutrition with medical complications (2013 Guidelines)                                                                                         |  |  |  |
| - - Individual monitoring and follow-up                                                                                                                                              |  |  |  |

This checklist is reproduced here with permission of Alive & Thrive and the Nutrition Center of the Philippines. It may be used for non-commercial purposes. It may be used for non-commercial purposes including citation of original source. Checklist prepared 2018.

|                                                                                                                                                                                    |  |  |  |
|------------------------------------------------------------------------------------------------------------------------------------------------------------------------------------|--|--|--|
| Diagnosis and Management of Moderately Acute Malnutrition (MAM)                                                                                                                    |  |  |  |
| <b>Food fortification</b>                                                                                                                                                          |  |  |  |
| - - wheat / maize                                                                                                                                                                  |  |  |  |
| - - rice                                                                                                                                                                           |  |  |  |
| - - salt and condiments                                                                                                                                                            |  |  |  |
| <b>Practical Skills / Role Plays / Demonstrations / Exercises</b>                                                                                                                  |  |  |  |
| <b>Communication and support skills</b>                                                                                                                                            |  |  |  |
| - - Establishing rapport with the mother                                                                                                                                           |  |  |  |
| - - Assessing the child's growth and breastfeeding practices                                                                                                                       |  |  |  |
| - - Analyzing the information provided                                                                                                                                             |  |  |  |
| - - Acting on the information provided by the caregiver                                                                                                                            |  |  |  |
| - - Listening and learning skills                                                                                                                                                  |  |  |  |
| - - Building confidence and giving support skills                                                                                                                                  |  |  |  |
| <b>Maternal health assessment and counselling</b>                                                                                                                                  |  |  |  |
| - - Assessing gestational weight gain                                                                                                                                              |  |  |  |
| - - Counseling pregnant and lactating women on a healthy, adequate diet                                                                                                            |  |  |  |
| <b>IYCF demonstration</b>                                                                                                                                                          |  |  |  |
| - - How to help a mother position and attach her baby                                                                                                                              |  |  |  |
| - - How to express breastmilk by hand                                                                                                                                              |  |  |  |
| - - How to cup feed a baby                                                                                                                                                         |  |  |  |
| <b>Assessment of IYCF practice</b>                                                                                                                                                 |  |  |  |
| - - How to take feeding history, 0 - 6 months                                                                                                                                      |  |  |  |
| - - How to take feeding history, 6 - 23 months                                                                                                                                     |  |  |  |
| <b>Counseling</b>                                                                                                                                                                  |  |  |  |
| - - Using GALIDRAA checklist ( <u>G</u> reet, <u>A</u> sk, <u>L</u> isten, <u>I</u> dentify, <u>D</u> iscuss, <u>R</u> ecommend, <u>A</u> gree, set follow-up <u>A</u> ppointment) |  |  |  |
| - - Assessing and classifying (analyzing) IYCF                                                                                                                                     |  |  |  |
| - - Measuring and assessing growth and counseling on growth and feeding                                                                                                            |  |  |  |
| <b>Assessing the child's growth</b>                                                                                                                                                |  |  |  |
| - - How to weigh a mother and baby using an electronic scale                                                                                                                       |  |  |  |
| - - How to measure baby's length or height                                                                                                                                         |  |  |  |
| - - How to plot weight and height in a child growth chart                                                                                                                          |  |  |  |
| - - How to interpret the results of the child's growth using the weight for age growth curve                                                                                       |  |  |  |
| - - How to calculate the weight for height Z score                                                                                                                                 |  |  |  |
| - - How to interpret the weight for height Z score                                                                                                                                 |  |  |  |
| - - How to take mid-upper arm circumference                                                                                                                                        |  |  |  |
| - - How to assess for bilateral pitting (Odema)                                                                                                                                    |  |  |  |
| <b>Nutrition program management skills for acute malnutrition, stunting, breastfeeding and other IYCF problems</b>                                                                 |  |  |  |
| Assess the burden, prevalence, and distribution of acute malnutrition, stunting, and other IYCF problems                                                                           |  |  |  |
| Map, mobilize, and consult partners and stakeholders                                                                                                                               |  |  |  |
| Perform bottleneck analysis for nutrition programs                                                                                                                                 |  |  |  |
| Develop a multi-sectoral plan to address malnutrition                                                                                                                              |  |  |  |
| Develop a monitoring and evaluation plan to track IYCF and nutrition indicators                                                                                                    |  |  |  |
| <b>Clinical management skills</b>                                                                                                                                                  |  |  |  |
| Management and support for infant feeding in maternity facilities (EINC and lactation management up to 3 days post-partum)                                                         |  |  |  |
| <b>Management of breast conditions and other breastfeeding difficulties</b>                                                                                                        |  |  |  |
| - - How to manage inverted nipples                                                                                                                                                 |  |  |  |

This checklist is reproduced here with permission of Alive & Thrive and the Nutrition Center of the Philippines. It may be used for non-commercial purposes. It may be used for non-commercial purposes including citation of original source. Checklist prepared 2018.

|                                                              |  |  |  |
|--------------------------------------------------------------|--|--|--|
| - - How to manage breast engorgement                         |  |  |  |
| - - How to manage breast mastitis and breast abscess         |  |  |  |
| <i>Diagnosis and management of Severe Acute Malnutrition</i> |  |  |  |
| -- Assessment                                                |  |  |  |
| -- Outpatient therapeutic care                               |  |  |  |
| -- In patient therapeutic care                               |  |  |  |
| -- Individual monitoring and follow-up                       |  |  |  |
| Management of Moderate Acute Malnutrition                    |  |  |  |

This checklist was devised based on:

- Infant and young child feeding: Model chapter for textbooks for medical students and allied health professionals, WHO 2009
- Combined course on growth assessment and IYCF counseling, WHO 2012
- Essential Nutrition Actions: improving maternal, newborn, infant and young child health and nutrition, WHO 2013
- Guideline updates on HIV and infant feeding: the duration of breastfeeding and support from health services to improve feeding practices among mothers living with HIV, WHO and UNICEF 2016
- Use of multiple micronutrient powders for point-of-use fortification of foods consumed by infants and young children aged 6 to 23 months and children aged 2 to 12 years, WHO 2016
- Guideline on protecting, promoting and supporting breastfeeding in facilities providing maternity and newborn services, WHO 2017.

***Note that some of these sources may have been updated or new material produced since the time when the checklist was prepared.***

***There may be additional topics and competencies to be added relevant to the needs of the specific setting.***
